# Supplementary material for: Stimuli-responsive fluorescence based on the solid-state bis[2-(2-benzothiazoly)phenolato]zinc(ii) complex and its fiber thin film
Source: Royal Society of Chemistry journal article supplement (doi:10.1039/c5ra09130f), 2015-01-01
Supplement: c5ra09130f1.pdf [file c5ra09130f1.pdf]

# Electronic Supplementary Information for Stimuli-Responsive Fluorescence Based on the Solid- State Bis[2-(2-benzothiazoly)phenolato]Zinc(II) Complex and Its Fiber Thin Film

Rui Gao,<sup>a,†</sup> Yibing Zhao,<sup>a,†</sup> Xiaogang Yang,<sup>b</sup> and Dongpeng Yan<sup>\*ab</sup>

<sup>a</sup> State Key Laboratory of Chemical Resource Engineering, Beijing University of Chemical Technology, Beijing 100029, P. R. China.

<sup>b</sup> Key Laboratory of Theoretical and Computational Photochemistry, Ministry of Education, College of Chemistry, Beijing Normal University, Beijing 100875, P. R. China.

\* Fax: +86-10-64425385; Tel: +86-1064412131;

Email : yandongpeng001@163.com; yandp@bnu.edu.cn

†: The two authors contribute equal to this work.

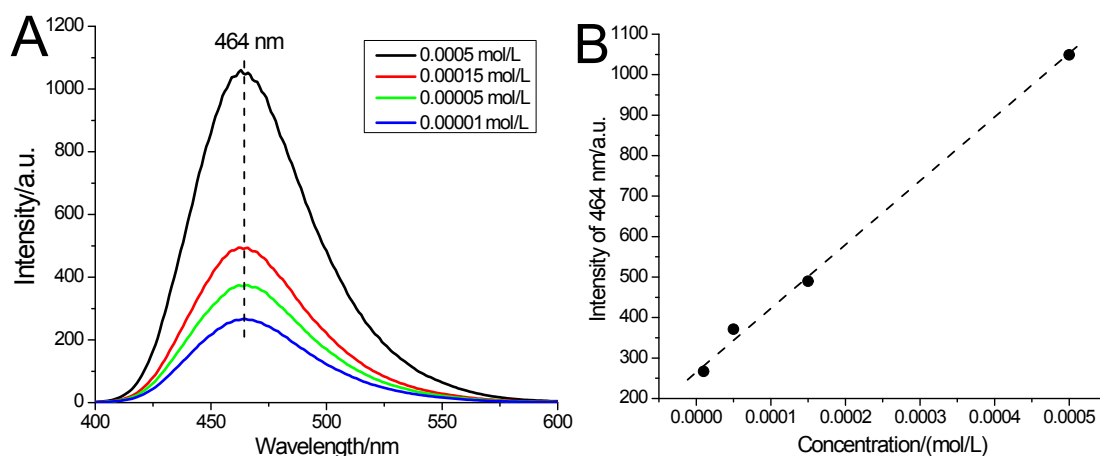

**Figure S1.** (A) The fluorescence spectra of Zn(BTZ)<sub>2</sub> solution in methanol ( $5 \times 10^{-4}$  to  $10^{-5}$  mol/L) and (B) the fluorescence intensity dependent on the concentrations of the solution.

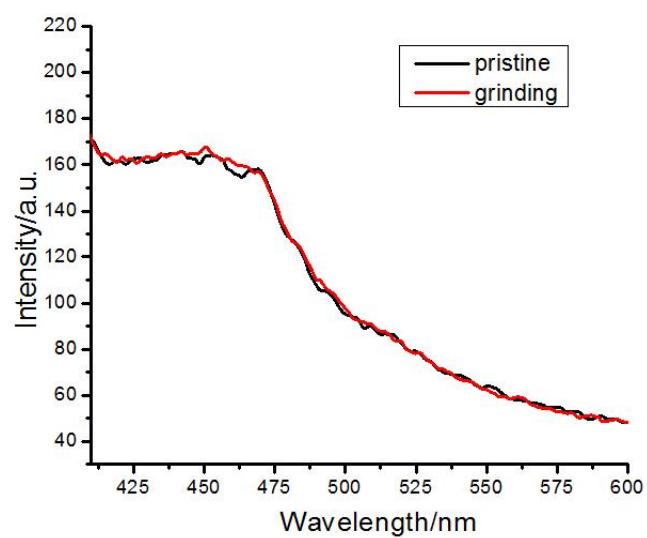

**Figure S2.** The emission spectra of the Cd(BTZ)<sub>2</sub> before and after grinding.

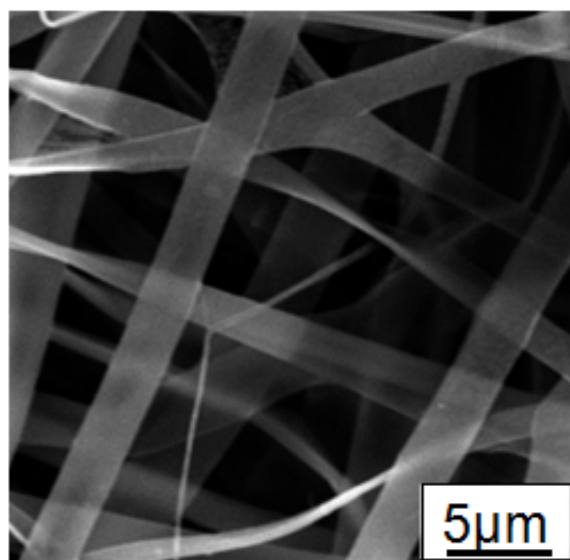

**Figure S3.** SEM image of the pristine PVA microfibers.
